# Supplementary material for: First-principles study of anisotropic planar 2D BC2N for sub-5 nm high-performance p-type transistors
Source: Royal Society of Chemistry journal article supplement (doi:10.1039/d4nr04600e), 2025-01-01
Supplement: d4nr04600e1.pdf [file d4nr04600e1.pdf]

# Supporting information

## First-Principles Study of Anisotropic Planar 2D BC<sub>2</sub>N for Sub-5 nm

### High-Performance P-Type Transistors

Hao Shi,<sup>a</sup> Siyu Yang,<sup>a</sup> Jialin Yang,<sup>a</sup> Chuyao Chen,<sup>a</sup> Yang Hu,<sup>a</sup> Gaoyu Liu,<sup>a</sup> Xiaojia Yuan,<sup>\*,a</sup> Hengze Qu,<sup>\*,a</sup> Shengli Zhang <sup>\*,a</sup>

<sup>a</sup> MIIT Key Laboratory of Advanced Display Materials and Devices, College of Material Science and Engineering, Nanjing University of Science and Technology, Nanjing 210094, China.

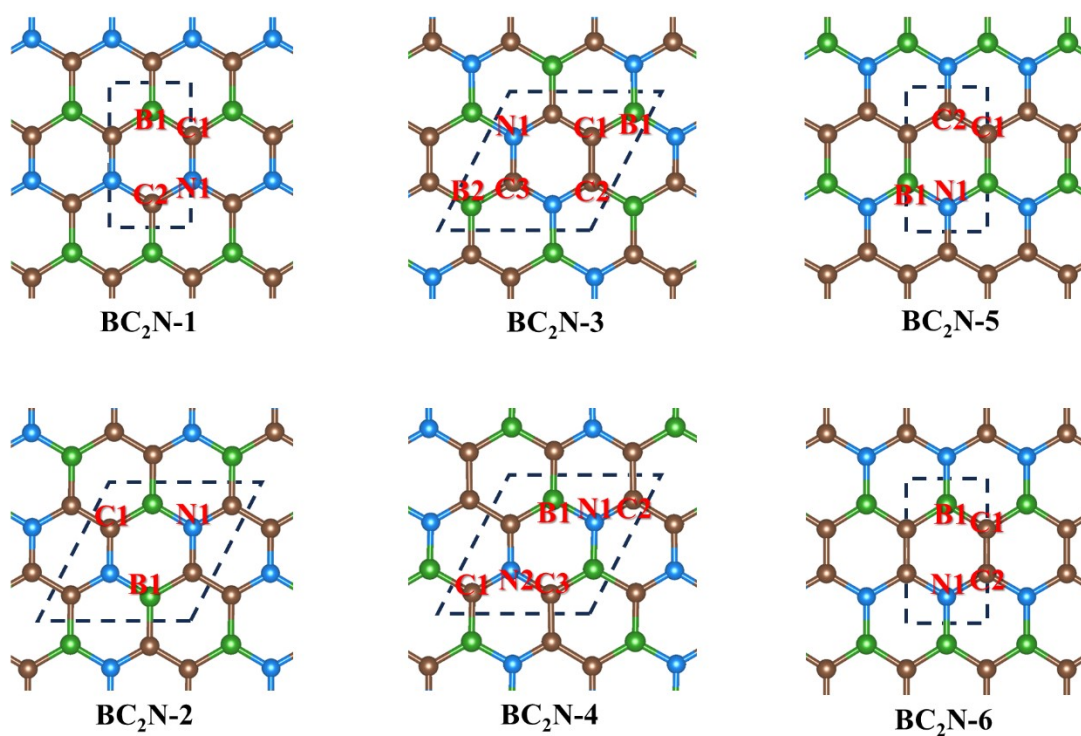

**Fig. S1.** Position of each atom in unit cell of six BC<sub>2</sub>N structures.

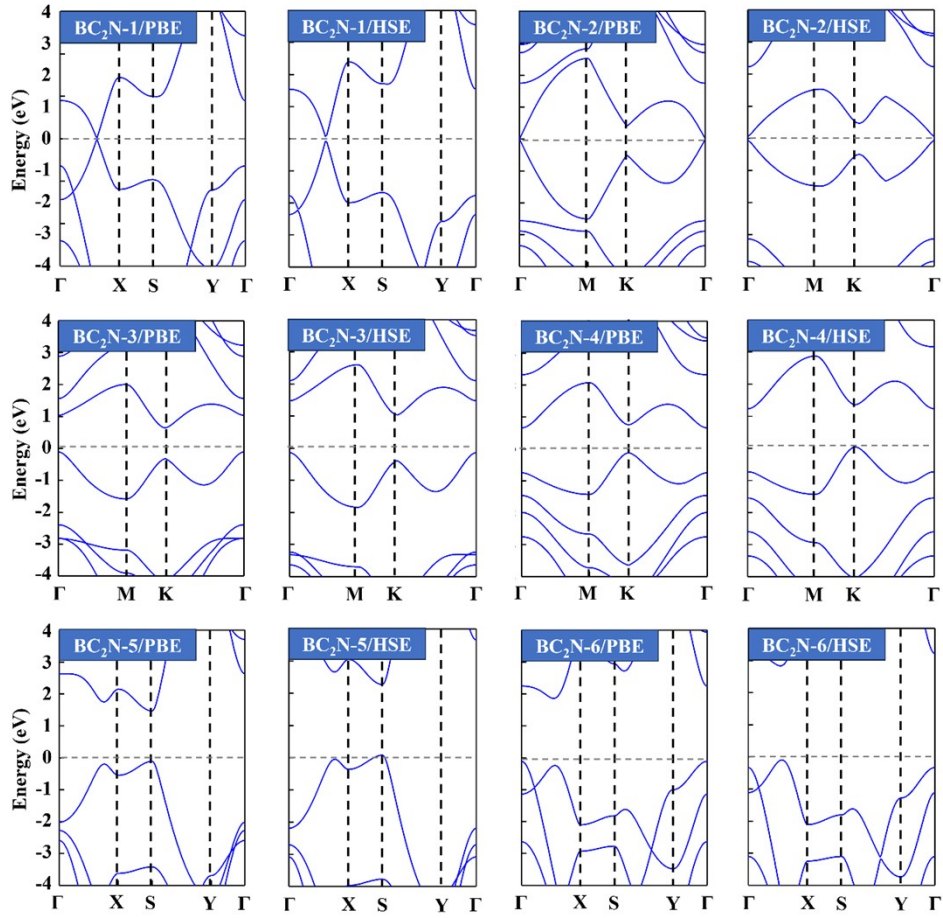

**Fig. S2.** Band structure of six BC<sub>2</sub>N structures at the PBE and HSE level.

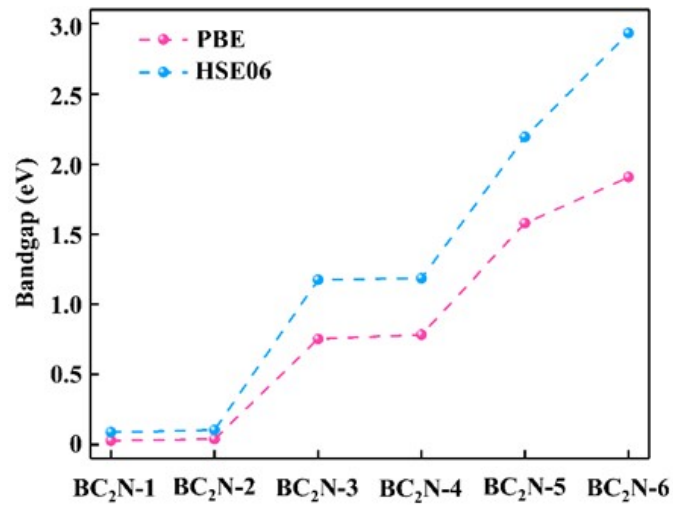

**Fig. S3.** Band gap variation of BC<sub>2</sub>N based PBE and HSE06 calculation. The value of bandgap based HSE calculation is obvious higher than that of PBE calculation, but the trend of bandgap changes obtained by these two methods is consistent.

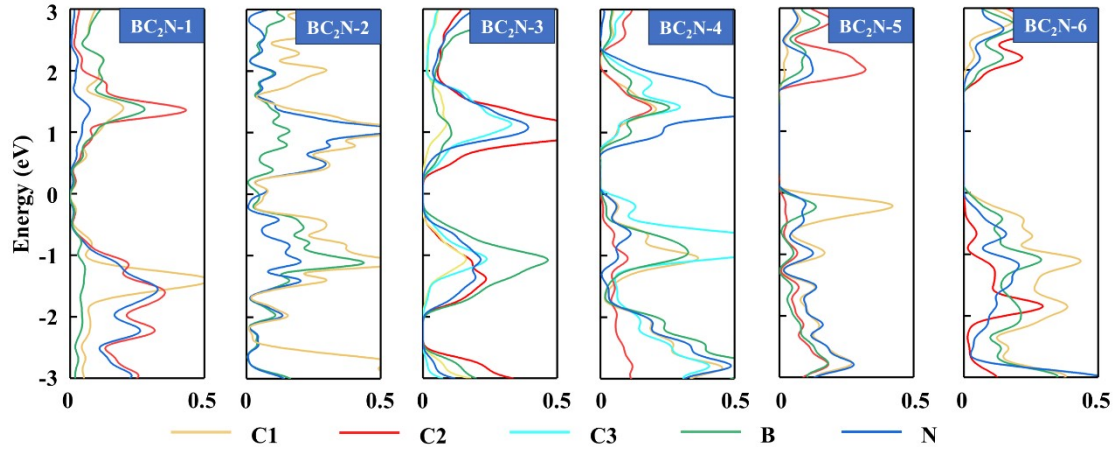

**Fig. S4.** PDOS of six  $\text{BC}_2\text{N}$  structures. The valance band maximum (VBM) of six structures is consisted with B and C atoms. The conduction band minimum (CBM) of  $\text{BC}_2\text{N}$ -1, 2, 3, 4, and 5 is consisted with N and C atoms, while that of  $\text{BC}_2\text{N}$ -6 is contributed by B and C atoms.

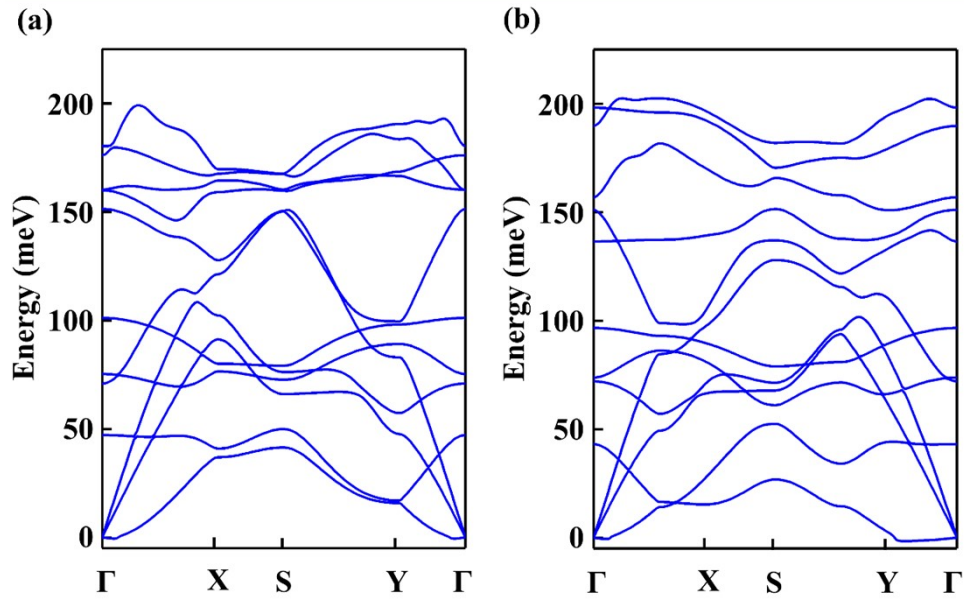

**Fig. S5.** Phonon band structure of (a)  $\text{BC}_2\text{N}$ -5 and (b)  $\text{BC}_2\text{N}$ -6. The phonon band structures of  $\text{BC}_2\text{N}$ -5 and  $\text{BC}_2\text{N}$ -6 do not have obvious phonon imaginary modes in the whole Brillouin zone, which indicates that the monolayer  $\text{BC}_2\text{N}$ -5 and  $\text{BC}_2\text{N}$ -6 are kinetically stable.

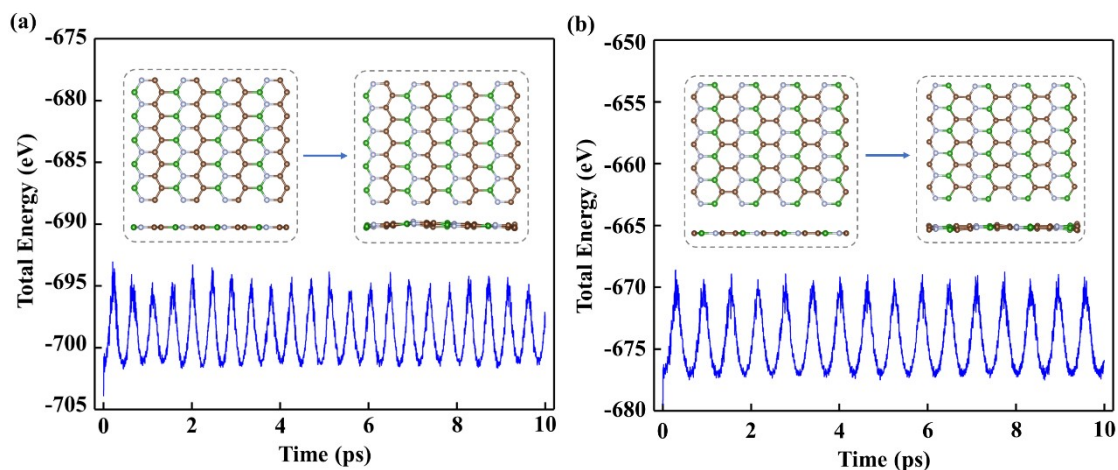

**Fig. S6.** Evolution of the total energies during the AIMD simulation for the pristine (a) BC<sub>2</sub>N-5 and (b) BC<sub>2</sub>N-6 nanosheet at 500 K. The snapshots for the final geometrical configurations at the end of the AIMD simulation are also depicted in the inset. The snapshots of the final geometry in **Fig. S6** clearly show that the structural integrity is well maintained. There was no bond breaking in the final geometry with only small atomic displacements. Thus, this confirms that the BC<sub>2</sub>N-5 and BC<sub>2</sub>N-6 systems have good thermal stability at 500 K.

**Table S1.** Bandgap, cohesive energy, space group, and lattice parameters of monolayer BC<sub>2</sub>N.

| Structure           | E <sub>g</sub> (eV)<br>PBE | E <sub>g</sub> (eV)<br>HSE06 | E <sub>coh</sub> (eV) | Space<br>group | a (Å) | b (Å) |
|---------------------|----------------------------|------------------------------|-----------------------|----------------|-------|-------|
| BC <sub>2</sub> N-1 | 0.028                      | 0.088                        | -7.026                | <i>pmmn</i>    | 4.391 | 2.489 |
| BC <sub>2</sub> N-2 | 0.039                      | 0.105                        | -7.314                | <i>pm</i>      | 5.073 | 5.073 |
| BC <sub>2</sub> N-3 | 0.753                      | 1.175                        | -7.304                | <i>pm</i>      | 5.030 | 5.030 |
| BC <sub>2</sub> N-4 | 0.783                      | 1.186                        | -7.284                | <i>pm</i>      | 5.033 | 5.033 |
| BC <sub>2</sub> N-5 | 1.578                      | 2.193                        | -7.578                | <i>pmmn</i>    | 4.358 | 2.484 |
| BC <sub>2</sub> N-6 | 1.906                      | 2.933                        | -7.273                | <i>pmmn</i>    | 4.351 | 2.497 |

**Table S2.** Bader charge of each atom of six BC<sub>2</sub>N structures in unite cell.

| structure           | B1      | B2      | C1     | C2      | C3      | N1     | N2 |
|---------------------|---------|---------|--------|---------|---------|--------|----|
| BC <sub>2</sub> N-1 | -1.8735 | /       | 0.9352 | -0.1590 | /       | 1.0973 | /  |
| BC <sub>2</sub> N-2 | -1.9016 | /       | 0.2042 | /       | /       | 1.4932 | /  |
| BC <sub>2</sub> N-3 | -1.9927 | -1.8278 | 0.4634 | 0.3411  | -0.2807 | 1.4778 | /  |

|                     |         |   |        |         |        |        |        |
|---------------------|---------|---|--------|---------|--------|--------|--------|
| BC <sub>2</sub> N-4 | -1.955  | / | 0.9145 | -0.4507 | 0.2656 | 1.7568 | 1.1612 |
| BC <sub>2</sub> N-5 | -2.0331 | / | 0.5022 | -0.3171 | /      | 1.8479 | /      |
| BC <sub>2</sub> N-6 | -1.9875 | / | 1.2820 | -0.5777 | /      | 1.2832 | /      |

**Table S3.** Comparison of the performance of the p-type monolayer BC<sub>2</sub>N-6 FETs in this work along armchair and zigzag directions with the requirements of the ITRS 2013 requirements for HP transistors.

| L <sub>g</sub><br>(nm) | V <sub>dd</sub><br>(V) | direction | I <sub>on</sub><br>(μA/μm) | SS<br>(mV/dec) | PDP<br>(fJ/μm) | τ<br>(ps) |
|------------------------|------------------------|-----------|----------------------------|----------------|----------------|-----------|
| 10                     | 0.74                   | zigzag    | 2415                       | 63             | 0.281          | 0.116     |
|                        |                        | armchair  | 1660                       | 63             | 0.155          | 0.093     |
| 9.7 (ITRS)             |                        |           | 1450                       |                | 0.510          | 0.477     |
| 7                      | 0.69                   | zigzag    | 2310                       | 70             | 0.184          | 0.080     |
|                        |                        | armchair  | 1793                       | 92             | 0.114          | 0.063     |
| 7.3 (ITRS)             |                        |           | 1170                       |                | 0.360          | 0.451     |
| 5                      |                        | zigzag    | 1653                       | 103            | 0.055          | 0.033     |
|                        |                        | armchair  | 1554                       | 93             | 0.059          | 0.038     |
| 5 (ITRS)               |                        |           | 900                        |                | 0.243          | 0.423     |
| 3                      |                        | zigzag    | 74.9                       | 227            | 0.024          | 0.324     |
|                        |                        | armchair  | /                          | /              | /              | /         |
| 3 <sup>+1UL</sup>      | 0.64                   | zigzag    | 1072                       | 124            | 0.034          | 0.032     |
|                        |                        | armchair  | 919                        | 130            | 0.038          | 0.041     |
| 3 <sup>+2UL</sup>      |                        | zigzag    | 659                        | 104            | 0.024          | 0.036     |
|                        |                        | armchair  | 576                        | 108            | 0.022          | 0.039     |
| 1 <sup>+2UL</sup>      |                        | zigzag    | 148                        | 205            | 0.015          | 0.102     |
|                        |                        | armchair  | 74                         | 245            | 0.010          | 0.135     |
| 1 <sup>+3UL</sup>      |                        | zigzag    | 135                        | 145            | 0.013          | 0.095     |
|                        |                        | armchair  | 101                        | 215            | 0.013          | 0.126     |

|                 |     |       |       |
|-----------------|-----|-------|-------|
| < 5.1<br>(ITRS) | 900 | 0.243 | 0.423 |
|-----------------|-----|-------|-------|
